**Supporting Information to the paper** Gautam et al. The utility of visual estimation of cover for rapid assessment of graminoid abundance in forest and grassland habitats in studies of animal foraging. *Phytocoenologia*.

**Supplement S1:** The graminoid species found in the forest quadrats are listed in first two columns. Species consumed by elephants are shown in the third column. Some species could not be identified and thus their local names or IDs have not been italicised. The food species list was prepared after these were observed to be consumed by elephants in another study where sampling was done over a larger extent and in two seasons (HG and TNCV unpubl.). The grasslands sampled in this study have two short grass species, *Cynodon dactylon* and *Sporobolus* sp.1.

| <b>All graminoid species</b>   | <b>All graminoid species</b>      | <b>Elephant food species</b>  |
|--------------------------------|-----------------------------------|-------------------------------|
| <i>Alloteropsis cimicina</i>   | <i>Paspalidium flavidum</i>       | <i>Apluda mutica</i>          |
| <i>Apluda mutica</i>           | <i>Paspalum conjugatum</i>        | <i>Axonopus compressus</i>    |
| <i>Axonopus compressus</i>     | <i>Paspalum scrobiculatum</i>     | <i>Chloris dolichostachya</i> |
| <i>Brachiaria semiundulata</i> | <i>Pseudanthistiria umbellata</i> | <i>Cynodon dactylon</i>       |
| <i>Carex</i> sp.               | <i>Scleria lithosperma</i>        | <i>Cyrtococcum accrescens</i> |
| <i>Chloris dolichostachya</i>  | <i>Setaria pumila</i>             | <i>Cyrtococcum oxyphyllum</i> |
| <i>Cynodon dactylon</i>        | <i>Sporobolus</i>                 | <i>Cyrtococcum patens</i>     |
| <i>Cyperus iria</i>            | <i>Sporobolus marginatus</i>      | <i>Digitaria adscendens</i>   |
| <i>Cyperus</i> sp.2            | <i>Sporobolus</i> sp.2            | <i>Digitaria</i> sp.2         |
| <i>Cyrtococcum accrescens</i>  | <i>Thelepogon elegans</i>         | <i>Heteropogon contortus</i>  |
| <i>Cyrtococcum oxyphyllum</i>  | <i>Themeda</i> sp.2               | <i>Ischaemum timorense</i>    |
| <i>Cyrtococcum patens</i>      | <i>Themeda triandria</i>          | <i>Kyllinga monocephala</i>   |
| <i>Dendrocalamus</i> sp.       | <i>Urochloa reptans</i>           | <i>Oplismenus compositus</i>  |
| <i>Dichanthium insculptum</i>  | Unidentified Grass 3              | <i>Oryza sativa</i>           |
| <i>Dichanthium</i> sp.2        | Unidentified Grass 11             | <i>Sporobolus</i> sp.2        |
| <i>Digitaria adscendens</i>    | Unidentified Grass 17             | <i>Themeda triandra</i>       |
| <i>Digitaria</i> sp.2          | Unidentified Grass 22             | <i>Themeda</i> sp.2           |
| <i>Echinochloa colonum</i>     | Unidentified Grass 29             | Unidentified Grass 17         |
| <i>Fimbristylis</i> sp.        | Unidentified Grass 55             |                               |

**Supporting Information to the paper** Gautam et al. The utility of visual estimation of cover for rapid assessment of graminoid abundance in forest and grassland habitats in studies of animal foraging. *Phytocoenologia*.

| <b>All graminoid species</b> | <b>All graminoid species</b> | <b>Elephant food species</b> |
|------------------------------|------------------------------|------------------------------|
| <i>Heteropogon contortus</i> | Unidentified Grass 56        |                              |
| <i>Ischaemum timorense</i>   | Unidentified Grass 58        |                              |
| <i>Kyllinga monocephala</i>  | Unidentified Grass 7         |                              |
| <i>Lepturus radicans</i>     | Unidentified Grass 9         |                              |
| <i>Oplismenus compositus</i> | Unidentified Tall Grass      |                              |
| <i>Oryza sativa</i>          | Unidentified Grass (Magge)   |                              |
| <i>Panicum montanum</i>      |                              |                              |
